# Supplementary material for: Rare Tumor-Normal Matched Whole Exome Sequencing Identifies Novel Genomic Pathogenic Germline and Somatic Aberrations
Source: MDPI journal article supplement (doi:10.3390/cancers12061618), 2020-06-18

# Supplementary Figures and Tables

Sprissler RS et al.

**Figure S1:** CNA gene counts from TCGA rare and common cancer cohorts. Gene-level results produced by GISTIC were downloaded from the cBioPortal. Only high-level amplifications (red) and putative homozygous deletions (blue) were included. **A).** All protein-coding genes. **B).** Oncogenes. **C).** Tumor suppressor genes.

**Figure S1A**

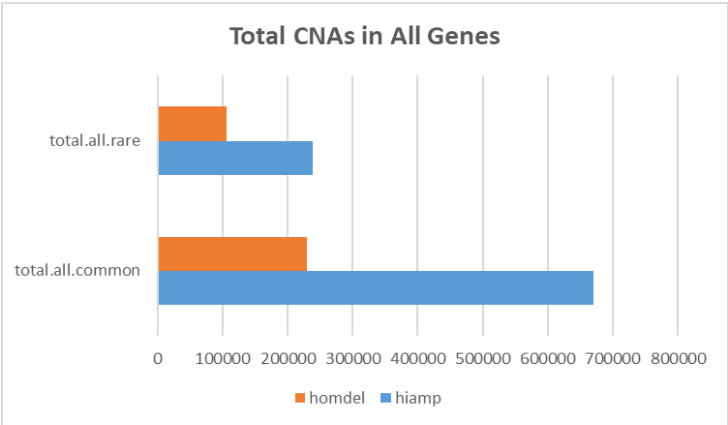

**Figure S1B**

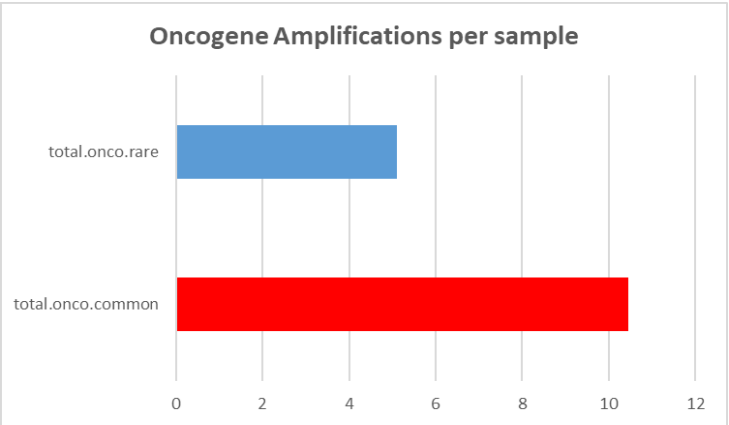

**Figure S1C**

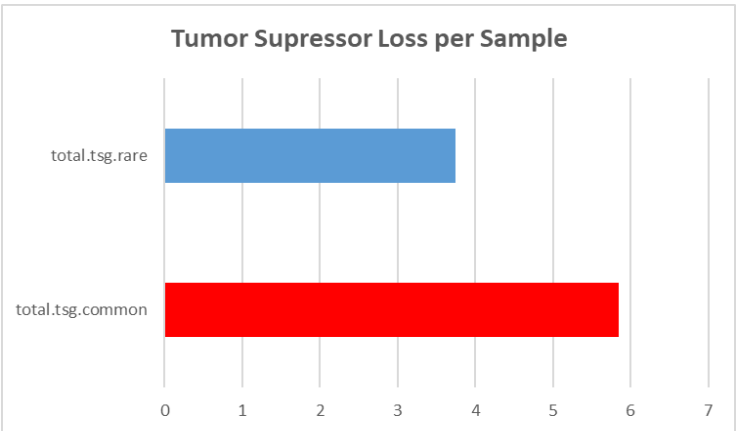

**Figure S2.** CNA gene counts from TCGA rare and common cancer cohorts, broken down by cancer type. **A).** All protein-coding genes. **B).** Oncogenes. **C).** Tumor suppressor genes.

**Figure S2A**

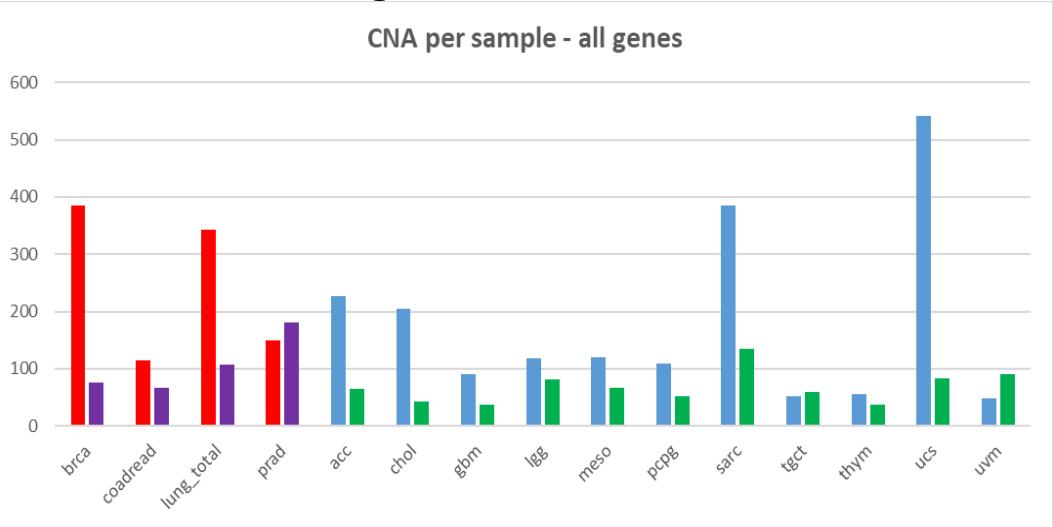

**Figure S2B**

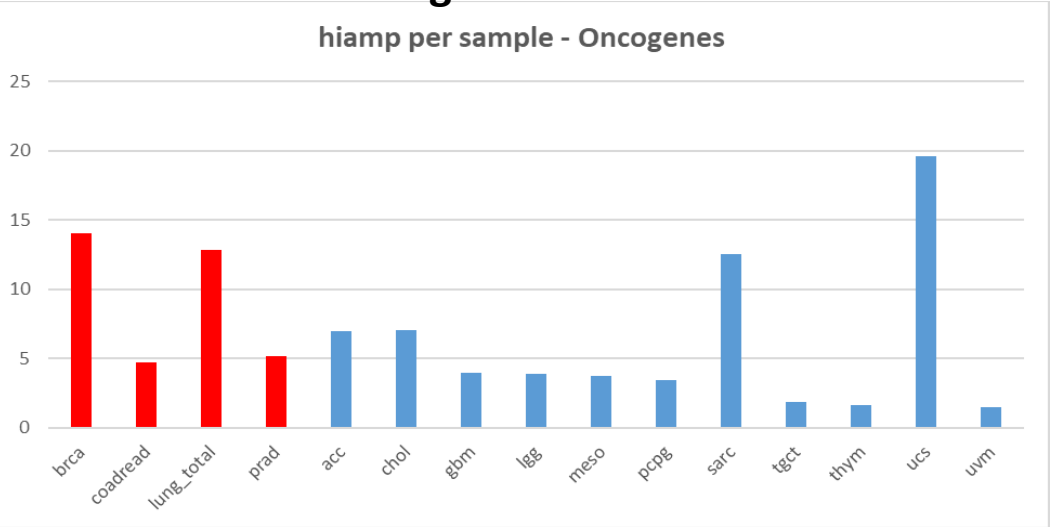

**Figure S2C**

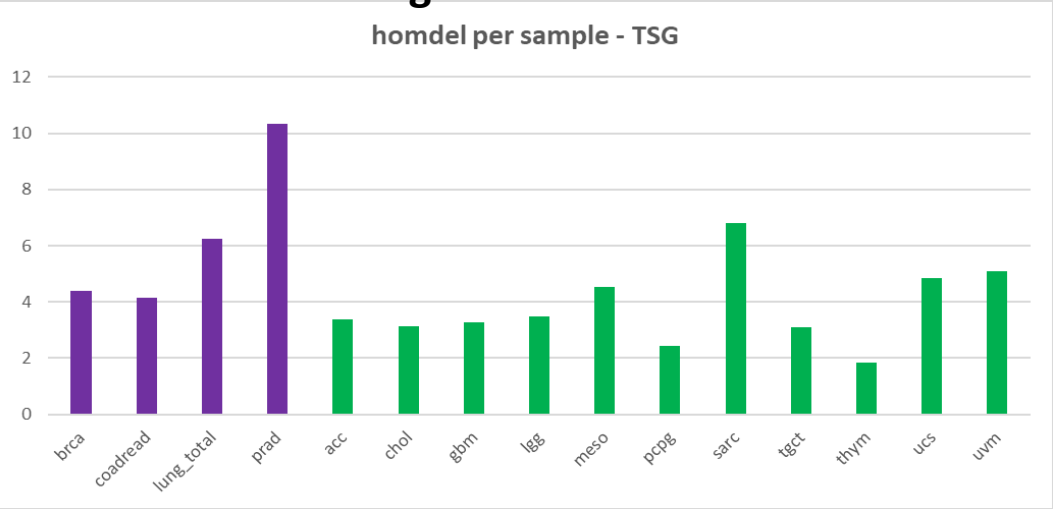

Supplement: s1 [file s1]
